# Supplementary material for: Polypharmacology-based Approach for Screening of Traditional Chinese Medicinal extract and Multi-dimensional Targeting Verification
Source: Research Square preprint supplement (doi:10.21203/rs.3.rs-142256/v1), 2021-01-13
Supplement: Supplementary file 1 [file 41c593634608104e3f992110.xlsx]

## Sheet: Sheet1
		中药名称	分类
3	Mori Cortex	桑白皮	止咳平喘药		MG：根据中兽医理论分析，急属实，慢属虚。环境恶化，阴冷潮湿，饲养管理不善，机体抵抗力下降等正气受损为诱因促使MG感染。根据此原因分析本病应属虚证范畴。同时根据MG感染后的病理变化，肺组织肉变，硬变，坏死及呼吸系统常见症状（气管啰音、咳喘）等都是邪证的表现。故本病属正虚邪实，治疗时应扶正祛邪，补肺润肺以扶正，清热解毒以祛邪，达到标本兼治的目的。
5	Ginkgo Folium	银杏叶	止咳平喘药
10	Eriobotryae Folium	枇杷叶	止咳平喘药
31	Farfarae Flos	款冬花	止咳平喘药
44	Stemonae Radix	百部	止咳平喘药
45	Rhododendri Daurici Folium	满山红	止咳平喘药
12	Ephedra Herba	麻黄	辛温解表药
8	Radix Bupleuri	柴胡	辛凉解表药
37	Paederiae Scandentis Herba	芍药	消食药
14	Evodiae Fructus	吴茱萸	温里药		E.COLI:湿热郁滞。本证多由伤寒表证已疲，邪陷阳明大肠所致，所以治疗以清里为主。表证已疲，邪入阳明，里热已炽，故见身热口渴饮水大增，里热上蒸于肺则作喘，外蒸于肌表则汗出;热邪内迫，大肠传导失司，故下利臭秽黄绿粪便，肛门有灼热感。鸡大肠杆菌病是由病菌内侵、肺胃热盛、血淤气滞引起,因此适合应用清热解毒、凉血、燥湿药物。
34	Alpiniae Officinarum Rhizome	高良姜	温里药
41	Zingiberis Rhizoma	姜	温里药
18	Cornus Officinalis Sieb. Et Zucc.	山茱萸	收涩药
25	Schisandrae Chinensis Fructus	北五味子	收涩药
27	Artemisia Annua L.	青蒿	清虚热药
24	Phellodendri Amurensis Cortex	关黄柏	清热燥湿药
30	Sophorae Flavescentis Radix	苦参	清热燥湿药
42	Scutellariae Radix	黄芩	清热燥湿药
11	Forsythiae Fructus	连翘	清热解毒药
13	Oroxyli Semen	木蝴蝶	清热解毒药
15	Lonicerae Japonicae Flos	金银花	清热解毒药
33	Scutellariae Barbatae Herba	半枝莲	清热解毒药
35	Folium Nelumbinis	荷叶	清热解毒药				中药名称	分类	归经	功能与主治	注意
40	Uncariae Ramulus Cumuncis	钩藤	平肝熄风药		3	Mori Cortex	桑白皮	止咳平喘药	甘，寒。归肺经。	泻肺平喘，利水消肿。用于肺热喘咳，水肿胀满尿少，面目肌肤浮肿
6	Corydalis Rhizoma	延胡索	理气药		5	Ginkgo Folium	银杏叶	止咳平喘药	甘、苦、淫，平。归心、肺经	活血化瘀，通络止痛，敛肺平喘，化浊降脂。用于瘀血阻络，胸痹心痛，中风偏瘫，肺虚咳喘，高脂血症	有实邪者忌用
20	Dalbergiae Odoriferae Lignum	降香降香	理气药		10	Eriobotryae Folium	枇杷叶	止咳平喘药	苦,微寒，归肺，胃经	清肺止咳，降逆止呕。用于肺热咳嗽，气逆喘急，胃热呕逆，烦热口渴。
39	Linderae Radix	沉香	理气药		12	Ephedra Herba	麻黄	辛温解表药	辛、微苦，温。归肺、膀胱经。	发汗散寒，宣肺平喘，利水消肿。用于风寒感冒，胸闷喘咳，风水浮肿。蜜麻黄润肺止咳。多用于表证已解，气喘咳嗽。
26	Cnidii Fructus	蛇床子	解毒杀虫燥湿止痒药		8	Radix Bupleuri	柴胡	辛凉解表药	辛、苦，微寒。归肝、胆、肺经	疏散退热，疏肝解郁，升举阳气。用于感冒发热，寒热往来，胸胁胀痛，月经不调，子宫脱垂，脱肛。
2	Radix Salviae	丹参	活血祛瘀药		14	Evodiae Fructus	吴茱萸	温里药	辛、苦，热;有小毒。归肝、脾、胃、肾经	散寒止痛，降逆止呕，助阳止泻用于厥阴头痛，寒疝腹痛，寒湿脚气，经行腹痛，脘腹胀痛，呕吐吞酸，五更泄泻。
21	Myrrha	没药	活血祛瘀药		18	Cornus Officinalis Sieb. Et Zucc.	山茱萸	收涩药	酸、涩，微温。归肝、肾经。	补益肝肾，收涩固脱。用于眩晕耳鸣，腰%膝酸痛，阳痿遗精,遗尿尿频，崩漏带下，大汗虚脱，内热消渴。
29	Chuanxiong Rhizoma	川芎	活血祛瘀药		11	Forsythiae Fructus	连翘	清热解毒药	苦，微寒。归肺、心、小肠经。	清热解毒，消肿散结，疏散风热。用于痈 疽，瘰疬，乳痈，丹毒，风热感冒，温病初起，温热入营，高热烦 渴，神昏发斑，热淋涩痛。
36	Spatholobus Suberectus Dunn	鸡血藤	活血祛瘀药		13	Oroxyli Semen	木蝴蝶	清热解毒药	苦、甘，凉。归肺、肝、胃经。	淸肺利咽，疏肝和胃。用于肺热咳嗽，喉 痹，音哑，肝胃气痛。
16	Carthami Flos	红花	活血祛痰药		15	Lonicerae Japonicae Flos	金银花	清热解毒药	甘，寒。归肺、心、胃经。	清热解毒，疏散风热。用于痈肿疔疮，喉 痹，丹毒，热毒血痢，风热感冒，温病发热。
17	Curcumae Radix	莪术	活血祛痰药		6	Corydalis Rhizoma	延胡索	理气药	辛、苦，温。归肝、脾经。	活血，行气，止痛。用于胸胁、脘腹疼痛，胸痹心痛，经闭痛经，产后瘀阻，跌扑肿痛
9	Hippophae Fructus	沙棘	化痰药		20	Dalbergiae Odoriferae Lignum	降香降香	理气药	辛，温。归肝、脾经	化瘀止血，理气止痛。用于吐血，衄血， 外伤出血，肝郁胁痛，胸痹刺痛，跌扑伤痛，呕吐腹痛。
19	Peucedani Radix	前胡	化痰药		2	Radix Salviae	丹参	活血祛瘀药	苦，微寒。归心、肝经	活血祛瘀，通经止痛，清心除烦，凉血消 痈。用于胸痹心痛，脘腹胁痛，癥瘕积聚，热痹疼痛，心烦不 眠，月经不调，痛经经闭，疮瘍肿痛
28	Arum Ternatum Thunb.	半夏	化痰药		16	Carthami Flos	红花	活血祛痰药	辛，温。归心、肝经。	活血通经，散瘀止痛。用于经闭，痛经， 恶露不行，癥瘕痞块，胸痹心痛，瘀滞腹痛，胸胁剌痛，跌扑损 伤，褡疡肿痛。
43	Amomum Aurantiacum H. T. Tsai Et S. W. Zhao	金砂仁	化湿药		17	Curcumae Radix	莪术	活血祛痰药	辛、苦，温。归肝、脾经。	行气破血，消积止痛。用于癥瘕痞块，淤血经闭，胸痹心痛，食积胀痛
46	Lycii Fructus	枸杞子	补阴药		9	Hippophae Fructus	沙棘	化痰药	酸、涩，温。归脾、胃、肺、心经。	健脾消食，止咳祛痰，活血散瘀。用于脾 虚食少，食积腹痛，咳嗽痰多，胸痹心痛，瘀血经闭，跌扑瘀肿„
4	Isatdis Radix	板蓝根	补阳药		19	Peucedani Radix	前胡	化痰药	苦、辛，微寒。归肺经。	降气化痰，散风清热。用于痰热喘满，略 痰黄稠，风热咳嗽痰多。
7	Epimrdii Herba	淫羊藿	补阳药		4	Isatdis Radix	板蓝根	补阳药	苦，寒。归心、胃经	清热解毒，凉血利咽。用于温疫时毒，发热咽痛，温毒发斑，痄腮，烂喉丹痧，大头瘟疫，丹毒，痈肿
22	Eucommiae Cortex	杜仲	补阳药		7	Epimrdii Herba	淫羊藿	补阳药	辛、甘，温。归肝、肾经。	补肾阳，强筋骨，祛风湿。用于肾阳虚 衰，阳痿遗精，筋骨痿软，风湿痹痛，麻木拘挛。
23	Morindae Officinalis Radix	巴戟天	补阳药		1	licorice	甘草	补气药	甘,平。归心、肺、脾、胃经。	补脾益气，淸热解毒，祛痰止咳，缓急止痛，调和诸药。用于脾胃虚弱，倦怠乏力，心悸气短，咳嗽痰多,脘腹、四肢挛急疼痛，痈肿疮毒,缓解药物毒性、烈性。	不宜与海藻、京大戟、红大戟、甘遂、芫花同用
1	licorice	甘草	补气药
32	Jujubae Fructus	酸枣仁	补气药
38	Codonopsis Radix	党参	补气药			桑白皮，银杏叶，连翘，丹参，板蓝根，甘草
47	Hedysarum Multijugum Maxim.	黄芪	补气药
48	Capsici Fructus	辣椒	拔毒化腐生肌药
						筛选后药物：连翘，板蓝根（君药），桑白皮，银杏叶（臣药），丹参，甘草（佐药，使药）
